# Supplementary material for: Association of cleft lip and palate on mother-to-infant bonding: a cross-sectional study in the Japan Environment and Children’s Study (JECS)
Source: Springer Nature journal article supplement (doi:10.1186/s12887-019-1877-9), 2019-12-01
Supplement: MOESM1 [file 17661142]

**Supplementary Table 1. Total basic characteristics of participating mothers.**

|                               | <b>Total (n = 79,140)</b> | <b>Healthy (n = 78,929)</b> | <b>CL/P (n = 211)</b> |
|-------------------------------|---------------------------|-----------------------------|-----------------------|
| <b>Age, Median (IQR)</b>      | 31 (28, 35)               | 31 (28, 35)                 | 31 (27,35)            |
| <b>MIBS score, Mean (SD)</b>  | 1.94 (2.29)               | 1.94 (2.29)                 | 2.13 (2.72)           |
| <b>Bonding disorders (≥5)</b> | 9,056 (11.4)              | 9,029 (11.4)                | 27 (12.8)             |
| <b>K6 score, Mean (SD)</b>    | 2.79 (3.61)               | 2.79 (3.61)                 | 3.06 (4.14)           |
| <b>Depression (≥13)</b>       | 2,106 (2.7)               | 2,098 (2.7)                 | 8 (3.8)               |
| <b>Parity, n (%)</b>          |                           |                             |                       |
| <b>Primiparae</b>             | 32,253 (40.8)             | 32,164 (40.8)               | 89 (42.2)             |
| <b>Multiparae</b>             | 46,887 (59.2)             | 46,765 (59.2)               | 122 (57.8)            |
| <b>Smoking habit, n (%)</b>   |                           |                             |                       |
| <b>Never</b>                  | 46,915 (59.3)             | 46,789 (59.3)               | 126 (59.7)            |
| <b>Stopped</b>                | 28,919 (36.5)             | 28,843 (36.5)               | 76 (36.0)             |
| <b>Smoking</b>                | 3,306 (4.2)               | 3,297 (4.2)                 | 9 (4.3)               |
| <b>Alcohol intake, n (%)</b>  |                           |                             |                       |
| <b>Never</b>                  | 27,526 (34.8)             | 27,447 (34.8)               | 79 (37.4)             |
| <b>Stopped</b>                | 43,745 (55.3)             | 43,629 (55.3)               | 116 (55.0)            |
| <b>Drinking</b>               | 7,869 (9.9)               | 7,853 (9.9)                 | 16 (7.6)              |
| <b>Infant sex, n (%)</b>      |                           |                             |                       |
| <b>Male</b>                   | 40,318 (50.9)             | 40,201 (50.9)               | 117 (55.5)            |
| <b>Female</b>                 | 38,822(49.1)              | 38,728 (49.1)               | 94 (44.5)             |
| <b>Feeding pattern, n (%)</b> |                           |                             |                       |
| <b>Breast</b>                 | 25,966 (32.8)             | 25,939 (32.9)               | 27 (12.8)             |
| <b>Mixed</b>                  | 51,326 (64.9)             | 51,168 (64.8)               | 158 (74.9)            |
| <b>Formula</b>                | 1,848 (2.3)               | 1,822 (2.3)                 | 26 (12.3)             |

IQR=interquartile range; SD=standard deviation.

Percentages and numbers of healthy infants and infants with CL/P may not sum to 100 or total numbers owing to rounding.
