# Supplementary material for: Association of cleft lip and palate on mother-to-infant bonding: a cross-sectional study in the Japan Environment and Children’s Study (JECS)
Source: Springer Nature journal article supplement (doi:10.1186/s12887-019-1877-9), 2019-12-01
Supplement: MOESM2 [file 17661142]

**Supplementary Table 2. Association of bonding disorders with the prevalence of CL/P with stratification either by maternal age or by parity.**

| <b>Total</b>                 |                      |                  |              |
|------------------------------|----------------------|------------------|--------------|
|                              | Healthy (n =78,929 ) | CL/P (n=211)     | p value      |
| Bonding Disorders, n (%)     | 9,029 (11.4)         | 27 (12.8)        |              |
| Crude                        | 1.00                 | 1.11 (0.74-1.68) | 0.613        |
| Model 1 <sup>a</sup>         | 1.00                 | 0.99 (0.66-1.50) | 0.961        |
| Model 2 <sup>b</sup>         | 1.00                 | 0.97 (0.63-1.48) | 0.880        |
| <b>Age stratification</b>    |                      |                  |              |
| <b>&lt;35</b>                |                      |                  |              |
|                              | Healthy (n = 57,321) | CL/P (n = 156)   | p value      |
| Bonding Disorders, n (%)     | 6,632(11.6)          | 14 (9.0)         |              |
| Crude                        | 1.00                 | 0.78 (0.45-1.35) | 0.381        |
| Model 1 <sup>a</sup>         | 1.00                 | 0.70 (0.40-1.21) | 0.204        |
| Model 2 <sup>b</sup>         | 1.00                 | 0.71 (0.40-1.24) | 0.222        |
| <b>≥35</b>                   |                      |                  |              |
|                              | Healthy (n = 21,608) | CL/P (n = 55)    | p value      |
| Bonding Disorders, n (%)     | 2,398 (11.1)         | 12 (21.8)        |              |
| Crude                        | 1.00                 | 2.24 (1.61-3.10) | <b>0.014</b> |
| Model 1 <sup>a</sup>         | 1.00                 | 1.95 (1.02-3.72) | <b>0.043</b> |
| Model 2 <sup>b</sup>         | 1.00                 | 1.81 (0.91-3.61) | 0.086        |
| <b>Parity stratification</b> |                      |                  |              |
| <b>Primiparae</b>            |                      |                  |              |
|                              | Healthy (n = 32,164) | CL/P (n = 89)    | p value      |
| Bonding Disorders, n (%)     | 4,423 (13.8)         | 8 (9.0)          |              |
| Crude                        | 1.00                 | 0.65 (0.32-1.34) | 0.244        |
| Model 1 <sup>a</sup>         | 1.00                 | 0.56 (0.27-1.17) | 0.122        |
| Model 2 <sup>b</sup>         | 1.00                 | 0.58 (0.28-1.22) | 0.152        |
| <b>Multiparae</b>            |                      |                  |              |
|                              | Healthy (n = 46,765) | CL/P (n = 122)   | p value      |
| Bonding Disorders, n (%)     | 4,607 (9.9)          | 18 (14.8)        |              |
| Crude                        | 1.00                 | 1.60 (0.96-2.65) | 0.070        |
| Model 1 <sup>a</sup>         | 1.00                 | 1.46 (0.88-2.42) | 0.145        |
| Model 2 <sup>b</sup>         | 1.00                 | 1.39 (0.82-2.35) | 0.222        |

Odds ratio (95% confidence interval) (all such values) for bonding disorders were compared with the reference participants.

<sup>a</sup>Adjusted for maternal factors (smoking and drinking habits, feeding pattern, and infant sex).

<sup>b</sup>Additionally adjusted for maternal depression with Model 1.

P values representing significant differences (<0.05) are indicated in bold.
