# Supplementary material for: Association of cleft lip and palate on mother-to-infant bonding: a cross-sectional study in the Japan Environment and Children’s Study (JECS)
Source: Springer Nature journal article supplement (doi:10.1186/s12887-019-1877-9), 2019-12-01
Supplement: MOESM3 [file 17661142]

**Supplementary Table 3. Association of bonding disorders with CL/P among advanced-age multiparae in complete data set analysis.**

| <b>&lt;35, Primiparae,</b> | <b>Healthy (n = 24,341)</b> | <b>CL/P (n = 65)</b> | <b>p value</b> |
|----------------------------|-----------------------------|----------------------|----------------|
| Bonding disorders, n (%)   | 3,295 (13.5)                | 4 (6.2)              |                |
| Crude                      | 1.00                        | 0.42 (0.15-1.15)     | 0.092          |
| Model 1 <sup>a</sup>       | 1.00                        | 0.36 (0.13-0.99)     | <b>0.047</b>   |
| Model 2 <sup>b</sup>       | 1.00                        | 0.38 (0.14-1.07)     | 0.067          |
| <b>&lt;35, Multiparae</b>  | <b>Healthy (n = 30,051)</b> | <b>CL/P (n = 79)</b> | <b>p value</b> |
| Bonding disorders, n (%)   | 2,890 (9.6)                 | 8 (10.1)             |                |
| Crude                      | 1.00                        | 1.06 (0.51-2.20)     | 0.878          |
| Model 1 <sup>a</sup>       | 1.00                        | 0.98 (0.47-2.04)     | 0.955          |
| Model 2 <sup>b</sup>       | 1.00                        | 0.97 (0.46-2.05)     | 0.939          |
| <b>≥35, Primiparae</b>     | <b>Healthy (n = 6,248)</b>  | <b>CL/P (n = 17)</b> | <b>p value</b> |
| Bonding disorders, n (%)   | 856 (13.7)                  | 2 (11.8)             |                |
| Crude                      | 1.00                        | 0.84 (0.19-3.68)     | 0.817          |
| Model 1 <sup>a</sup>       | 1.00                        | 0.76 (0.17-3.32)     | 0.710          |
| Model 2 <sup>b</sup>       | 1.00                        | 0.82 (0.19-3.59)     | 0.790          |
| <b>≥35, Multiparae</b>     | <b>Healthy (n = 14,526)</b> | <b>CL/P (n = 34)</b> | <b>p value</b> |
| Bonding disorders, n (%)   | 1,420 (9.8)                 | 7 (20.6)             |                |
| Crude                      | 1.00                        | 2.39 (1.04-5.51)     | <b>0.040</b>   |
| Model 1 <sup>a</sup>       | 1.00                        | 2.09 (0.90-4.85)     | 0.087          |
| Model 2 <sup>b</sup>       | 1.00                        | 2.10 (0.88-5.01)     | 0.095          |

Odds ratio (95% confidence interval) (all such values) for bonding disorders were compared with the reference participants.

<sup>a</sup>Adjusted for maternal factors (smoking and drinking habits, feeding pattern, and infant sex).

<sup>b</sup>Additionally adjusted for maternal depression with Model 1.

P values representing significant differences (<0.05) are indicated in bold.
